# Supplementary material for: Theonellamide G, a Potent Antifungal and Cytotoxic Bicyclic Glycopeptide from the Red Sea Marine Sponge Theonella swinhoei
Source: MDPI journal article supplement (doi:10.3390/md12041911), 2014-04-01

## Supplementary Information

**Figure S1.** 600 MHz  $^1\text{H}$  NMR Spectrum of compound **1** ( $\text{DMSO-d}_6\text{:H}_2\text{O}$ , 4:1).

**Figure S2.** 150 MHz  $^{13}\text{C}$  NMR Spectrum of compound **1** ( $\text{DMSO-d}_6\text{:H}_2\text{O}$ , 4:1).

**Figure S3.** DQF COSY Spectrum of compound **1** ( $\text{DMSO-d}_6\text{:H}_2\text{O}$ , 4:1).

**Figure S4.** HSQC Spectrum of compound **1** ( $\text{DMSO-d}_6\text{:H}_2\text{O}$ , 4:1).

**Figure S5.** HMBC spectrum of compound **1** ( $\text{DMSO-d}_6\text{:H}_2\text{O}$ , 4:1).

**Figure S6.** NOESY spectrum of compound **1** ( $\text{DMSO-d}_6\text{:H}_2\text{O}$ , 4:1).

**Figure S1.** 600 MHz  $^1\text{H}$  NMR Spectrum of compound **1** ( $\text{DMSO}-d_6:\text{H}_2\text{O}$ , 4:1).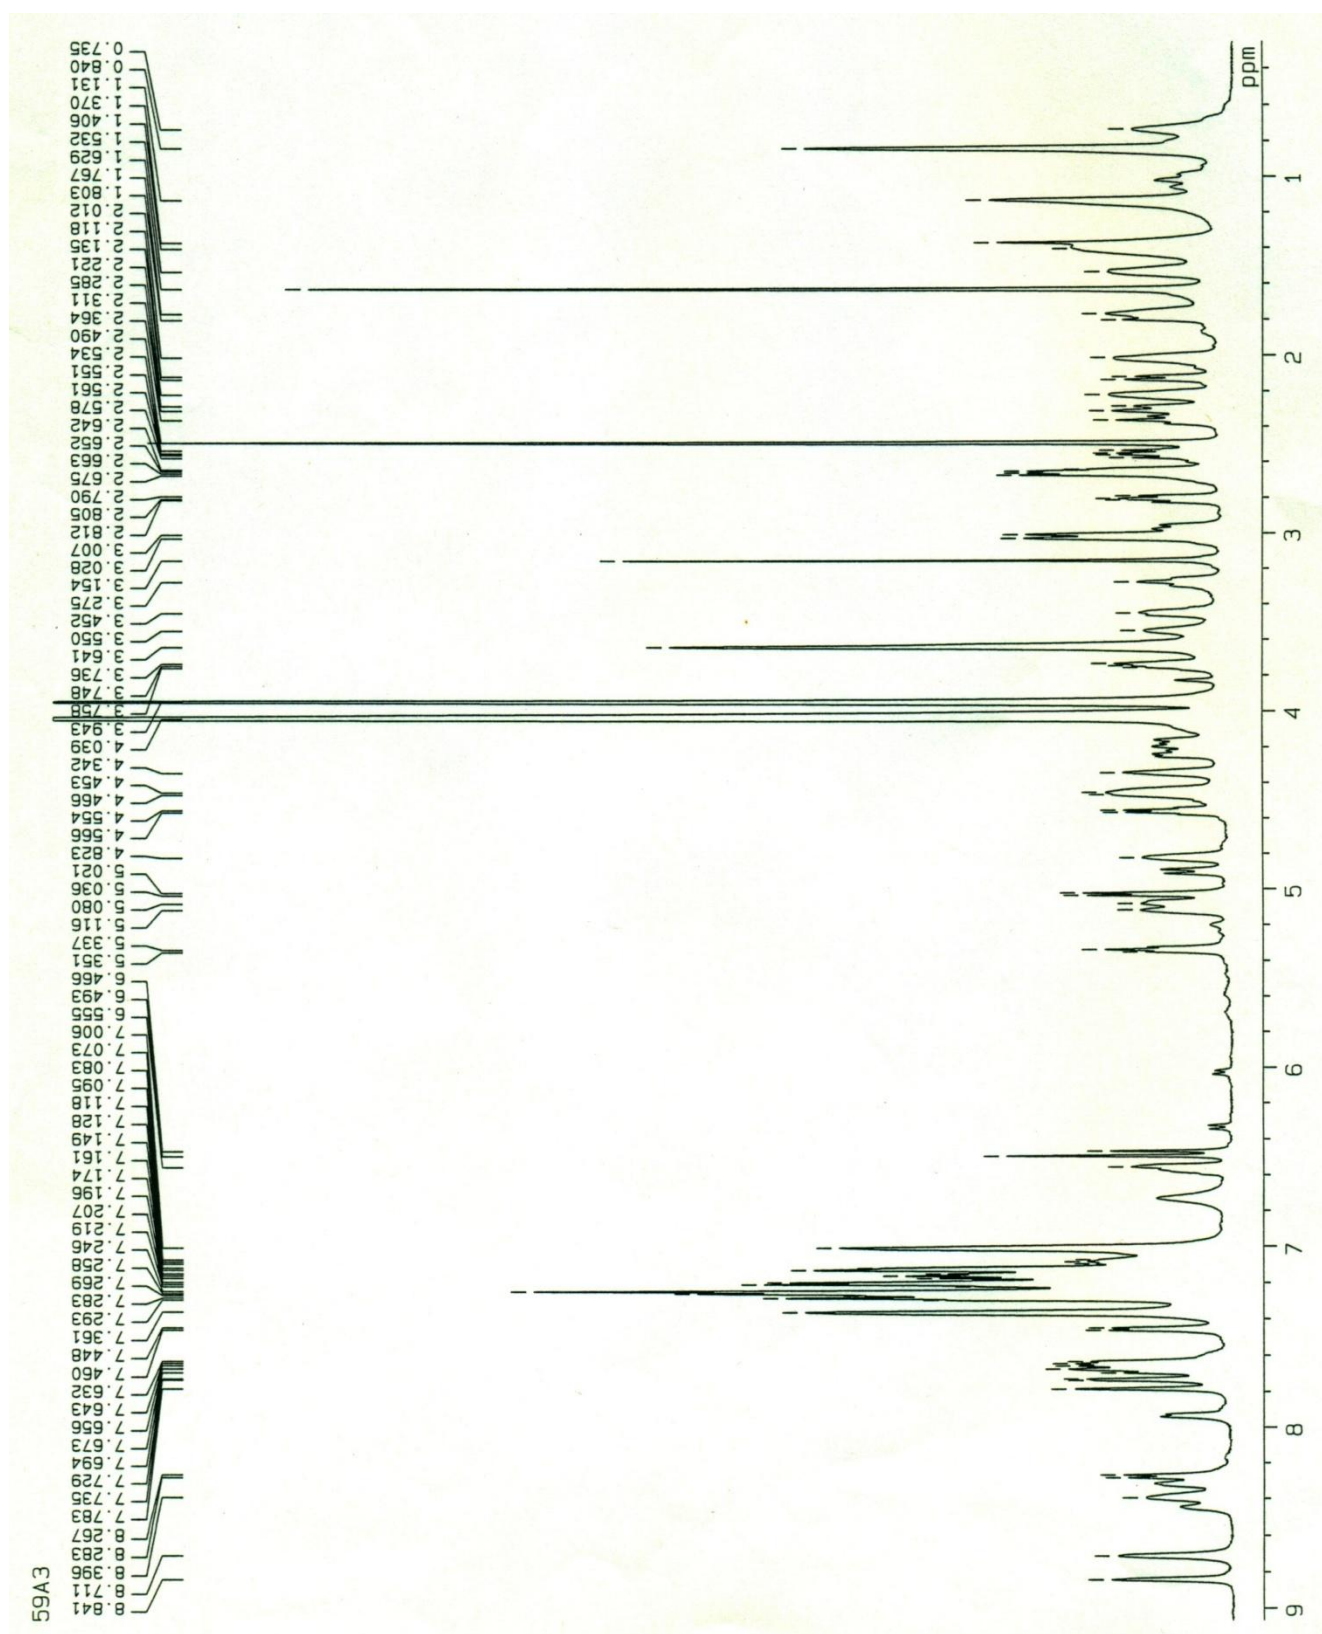

**Figure S2.** 150 MHz  $^{13}\text{C}$  NMR Spectrum of compound **1** ( $\text{DMSO-}d_6\text{:H}_2\text{O}$ , 4:1).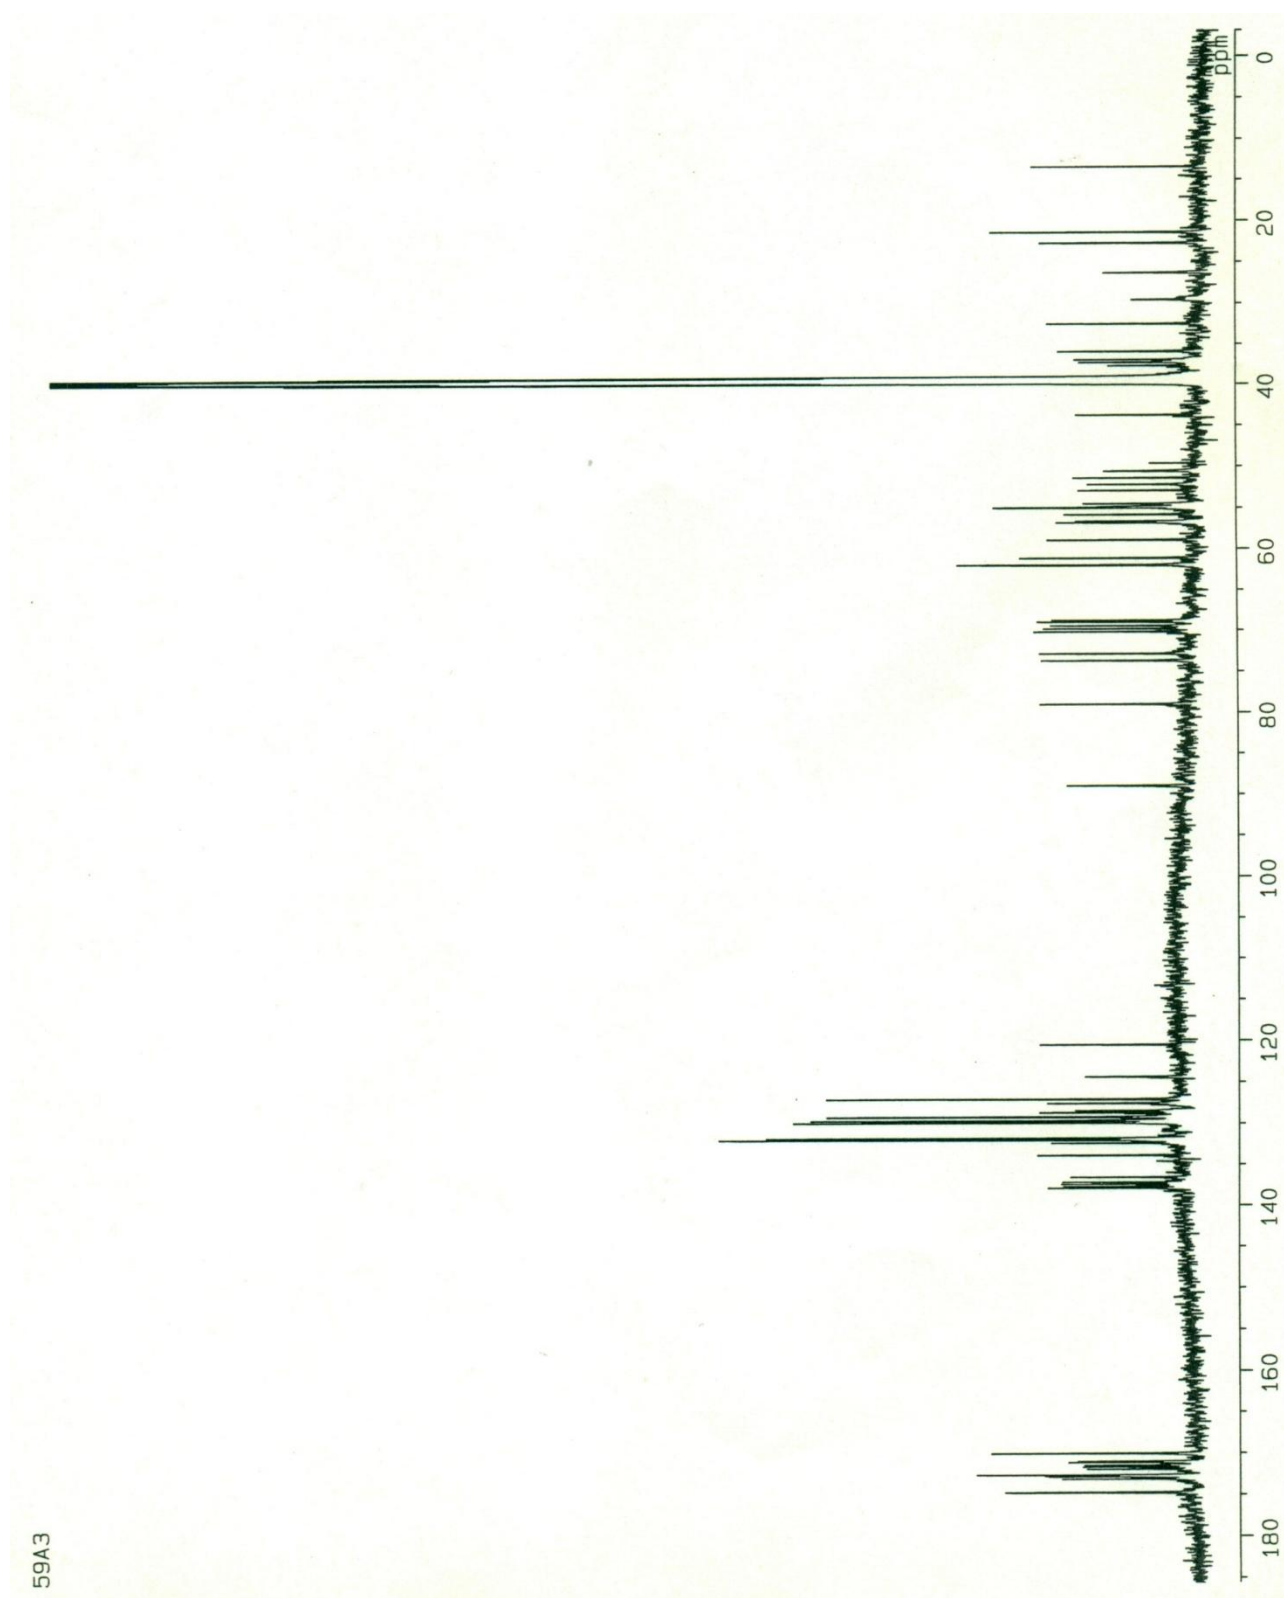

**Figure S3.** DQF COSY Spectrum of compound **1** (DMSO- $d_6$ :H $_2$ O, 4:1).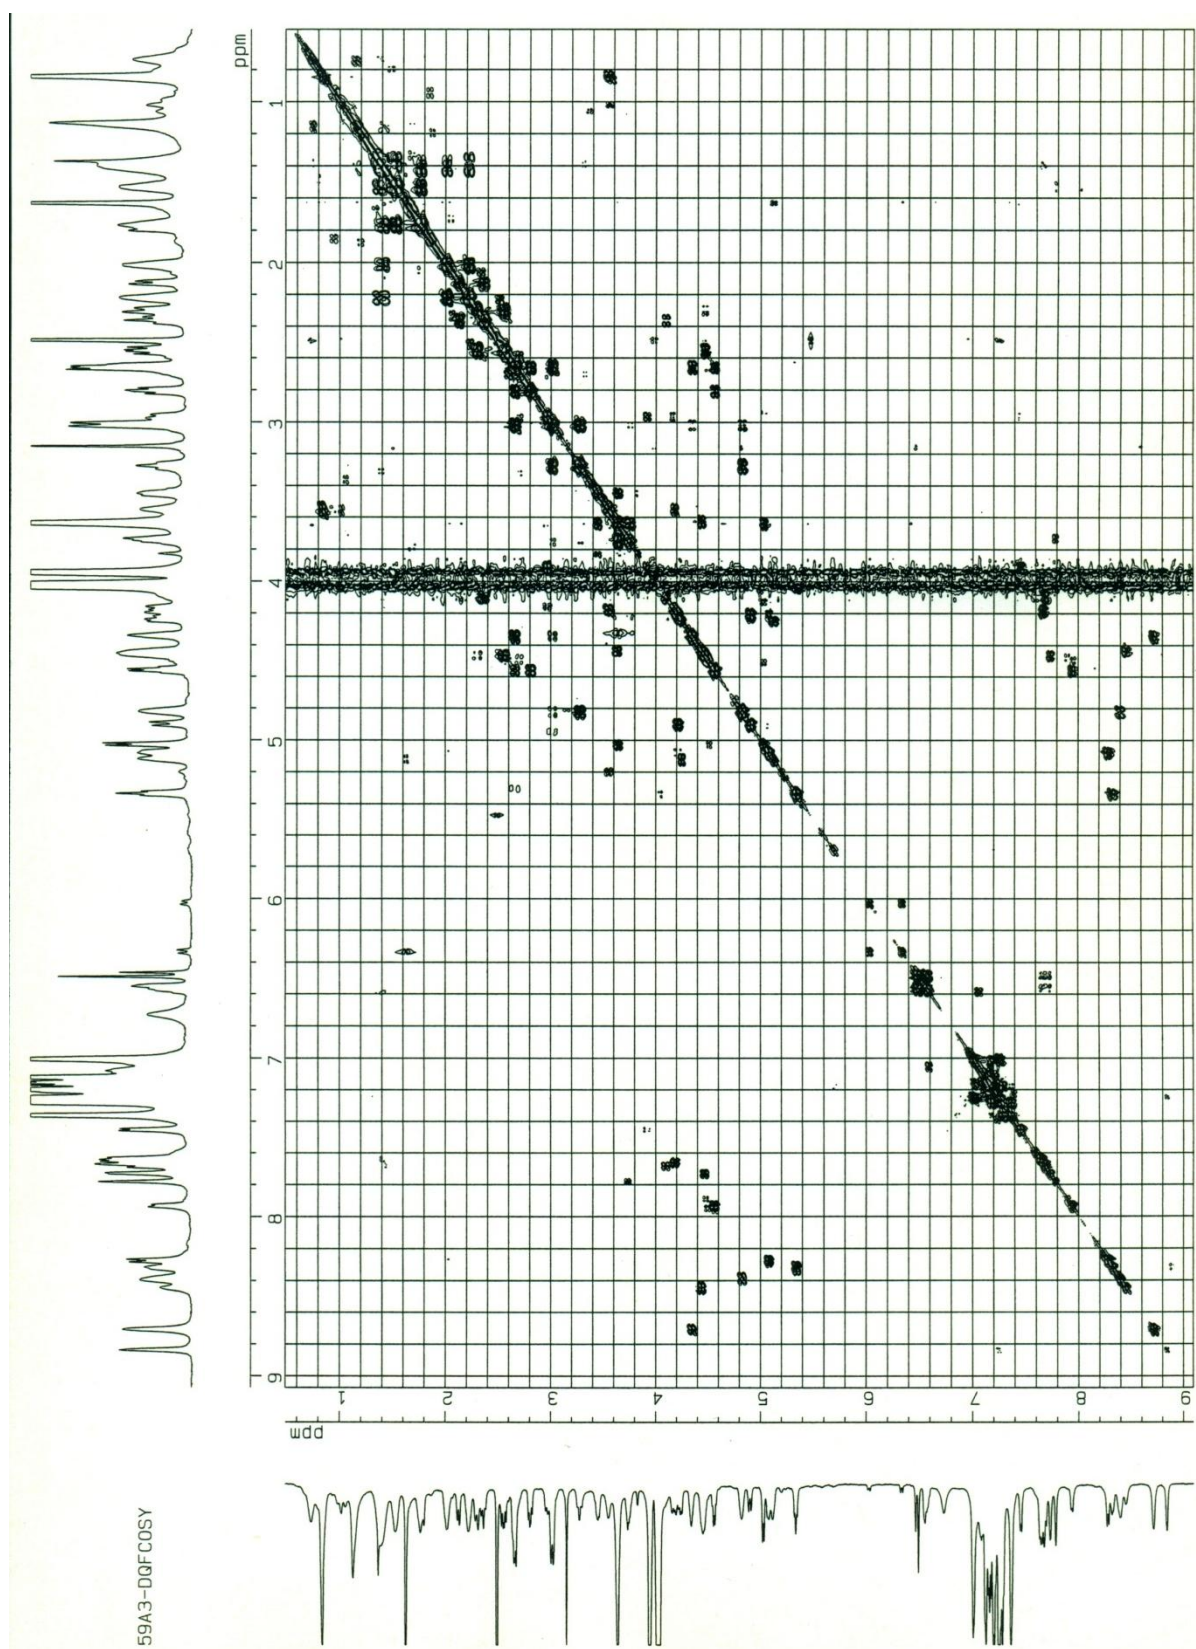



**Figure S4.** HSQC Spectrum of compound **1** (DMSO- $d_6$ :H $_2$ O, 4:1).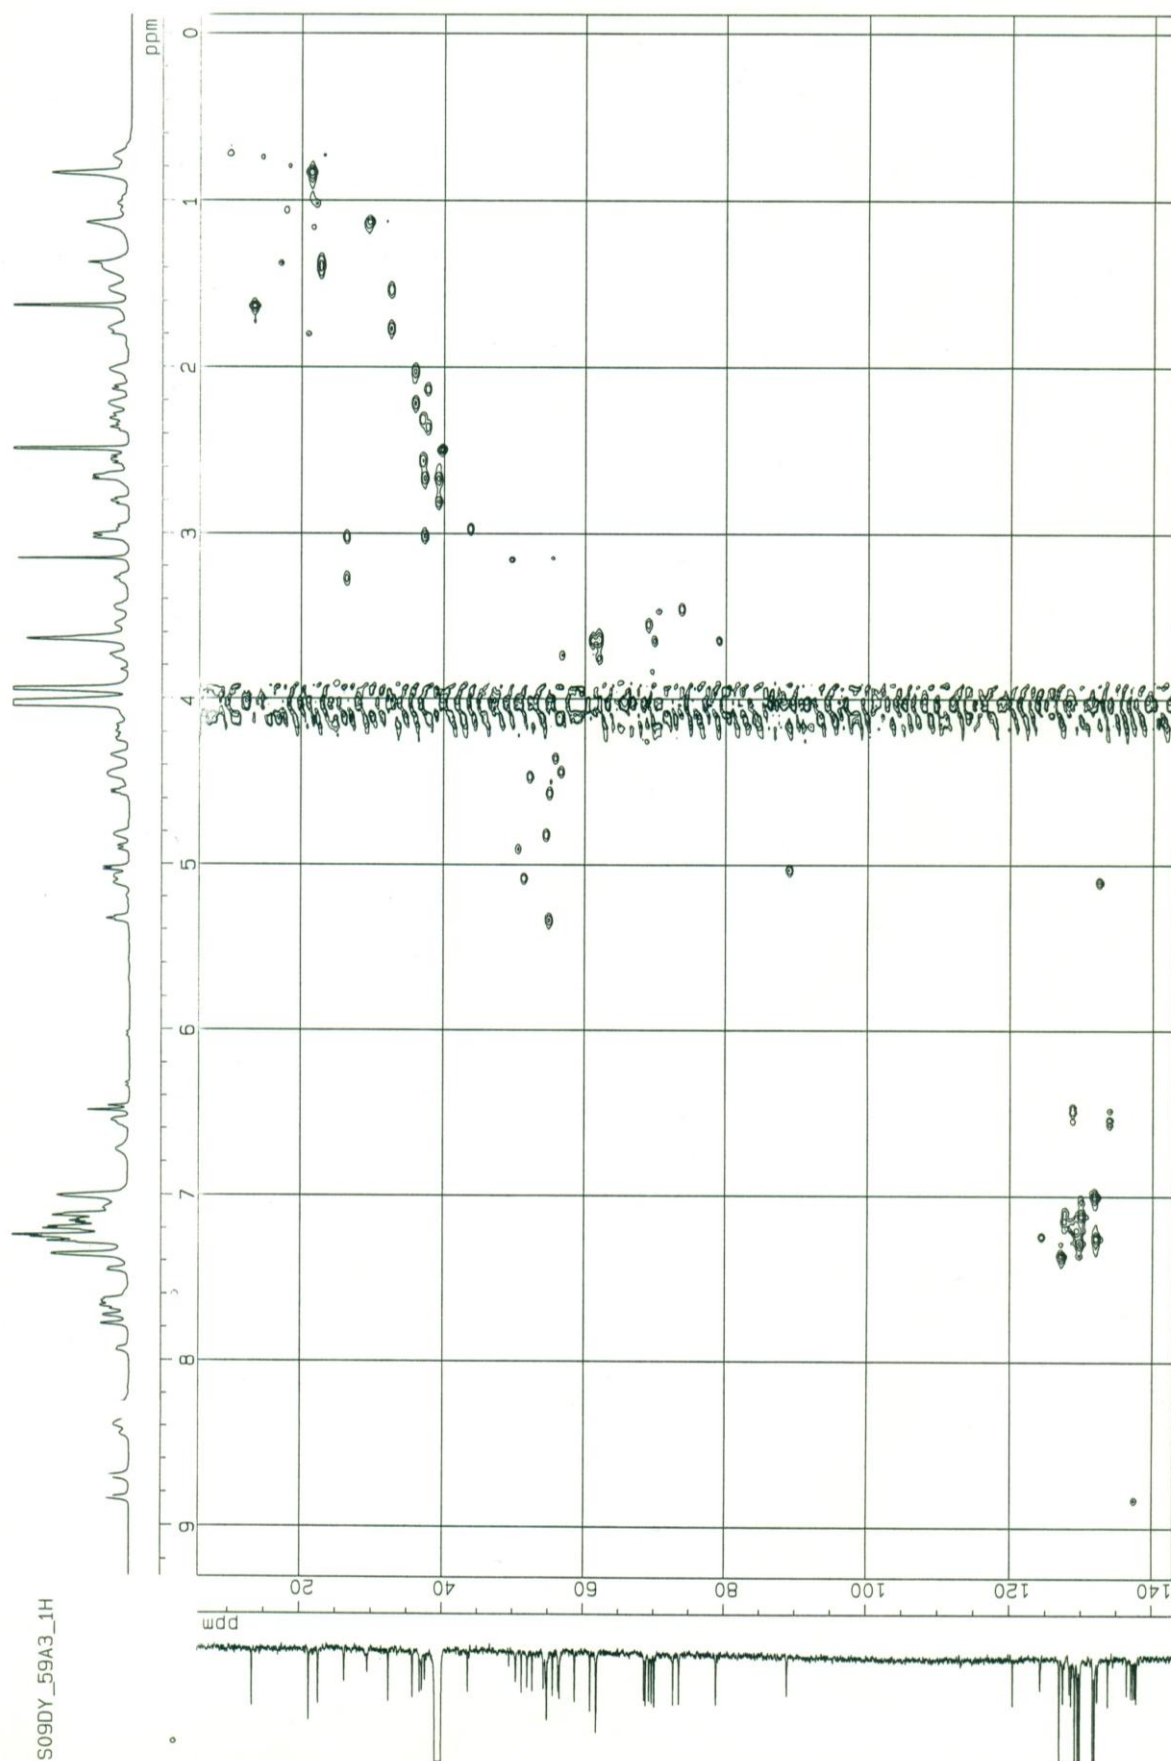

**Figure S5.** HMBC spectrum of compound **1** (DMSO- $d_6$ :H $_2$ O, 4:1).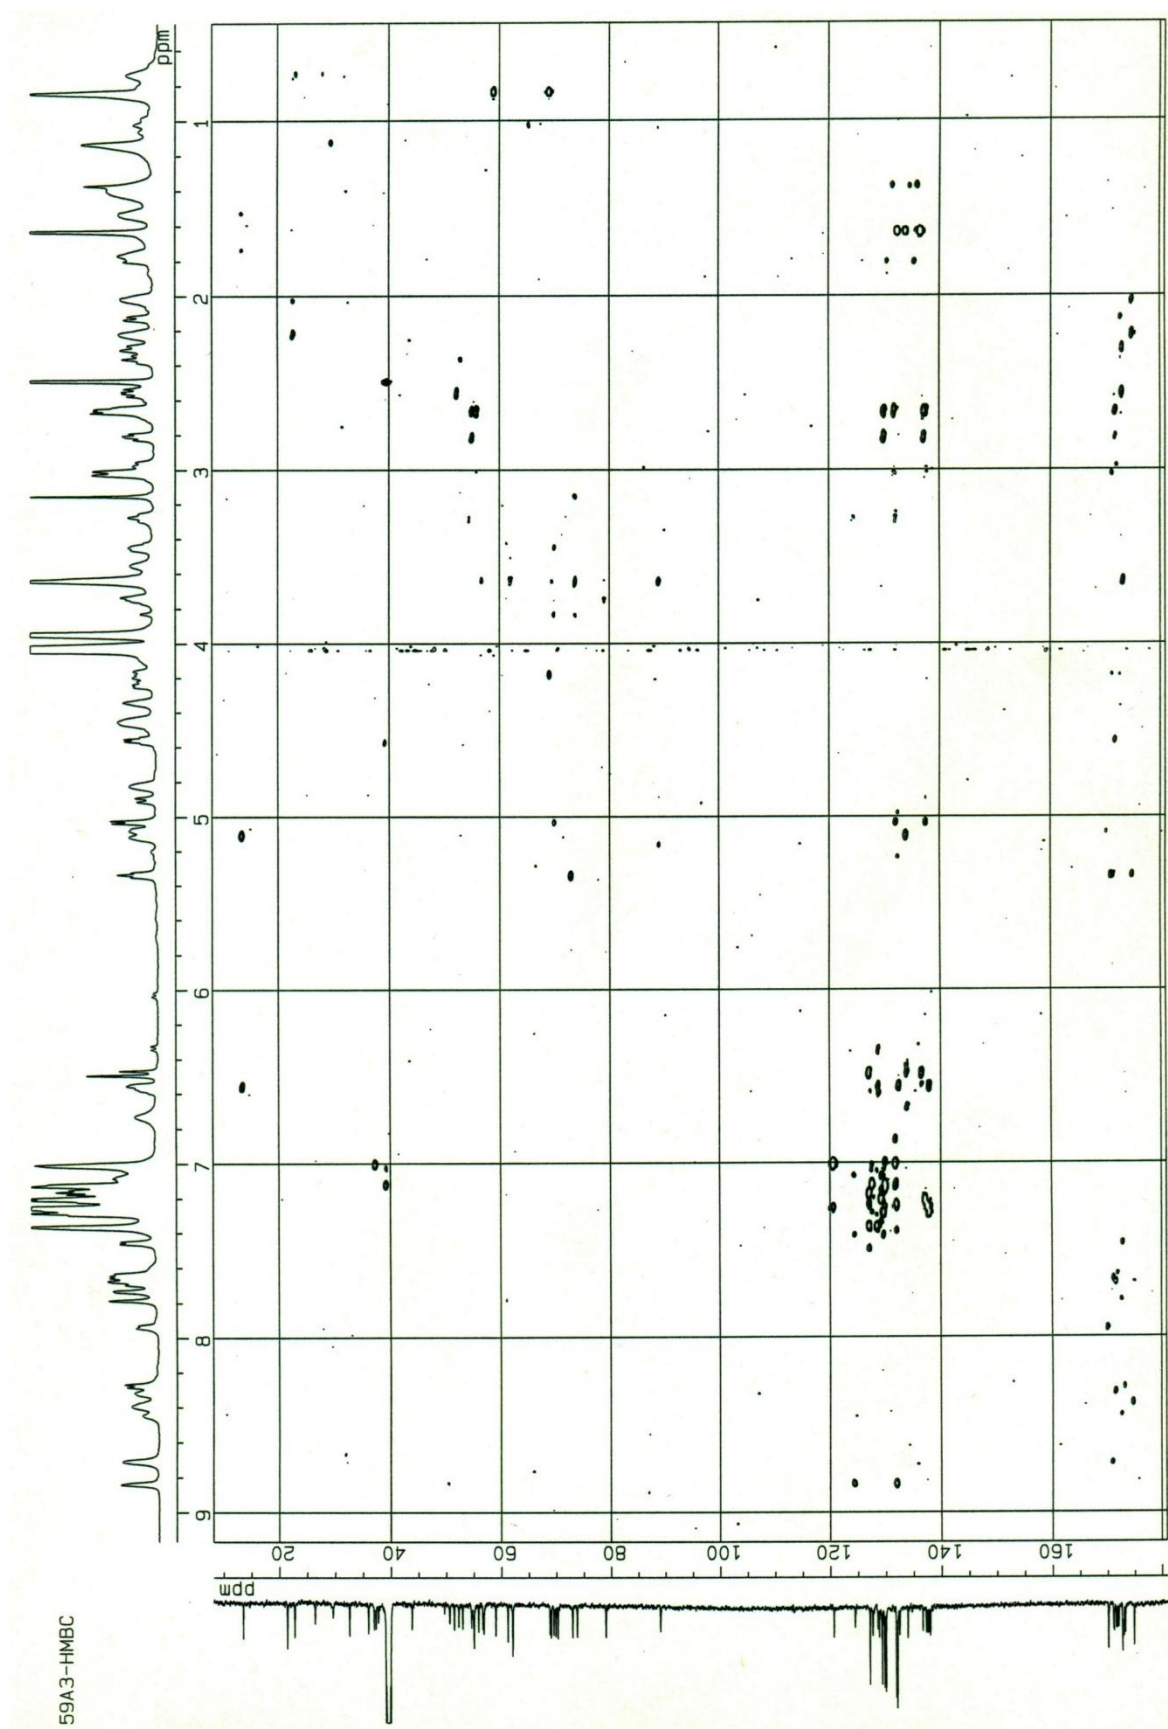

**Figure S6.** NOESY spectrum of compound **1** (DMSO- $d_6$ :H $_2$ O, 4:1).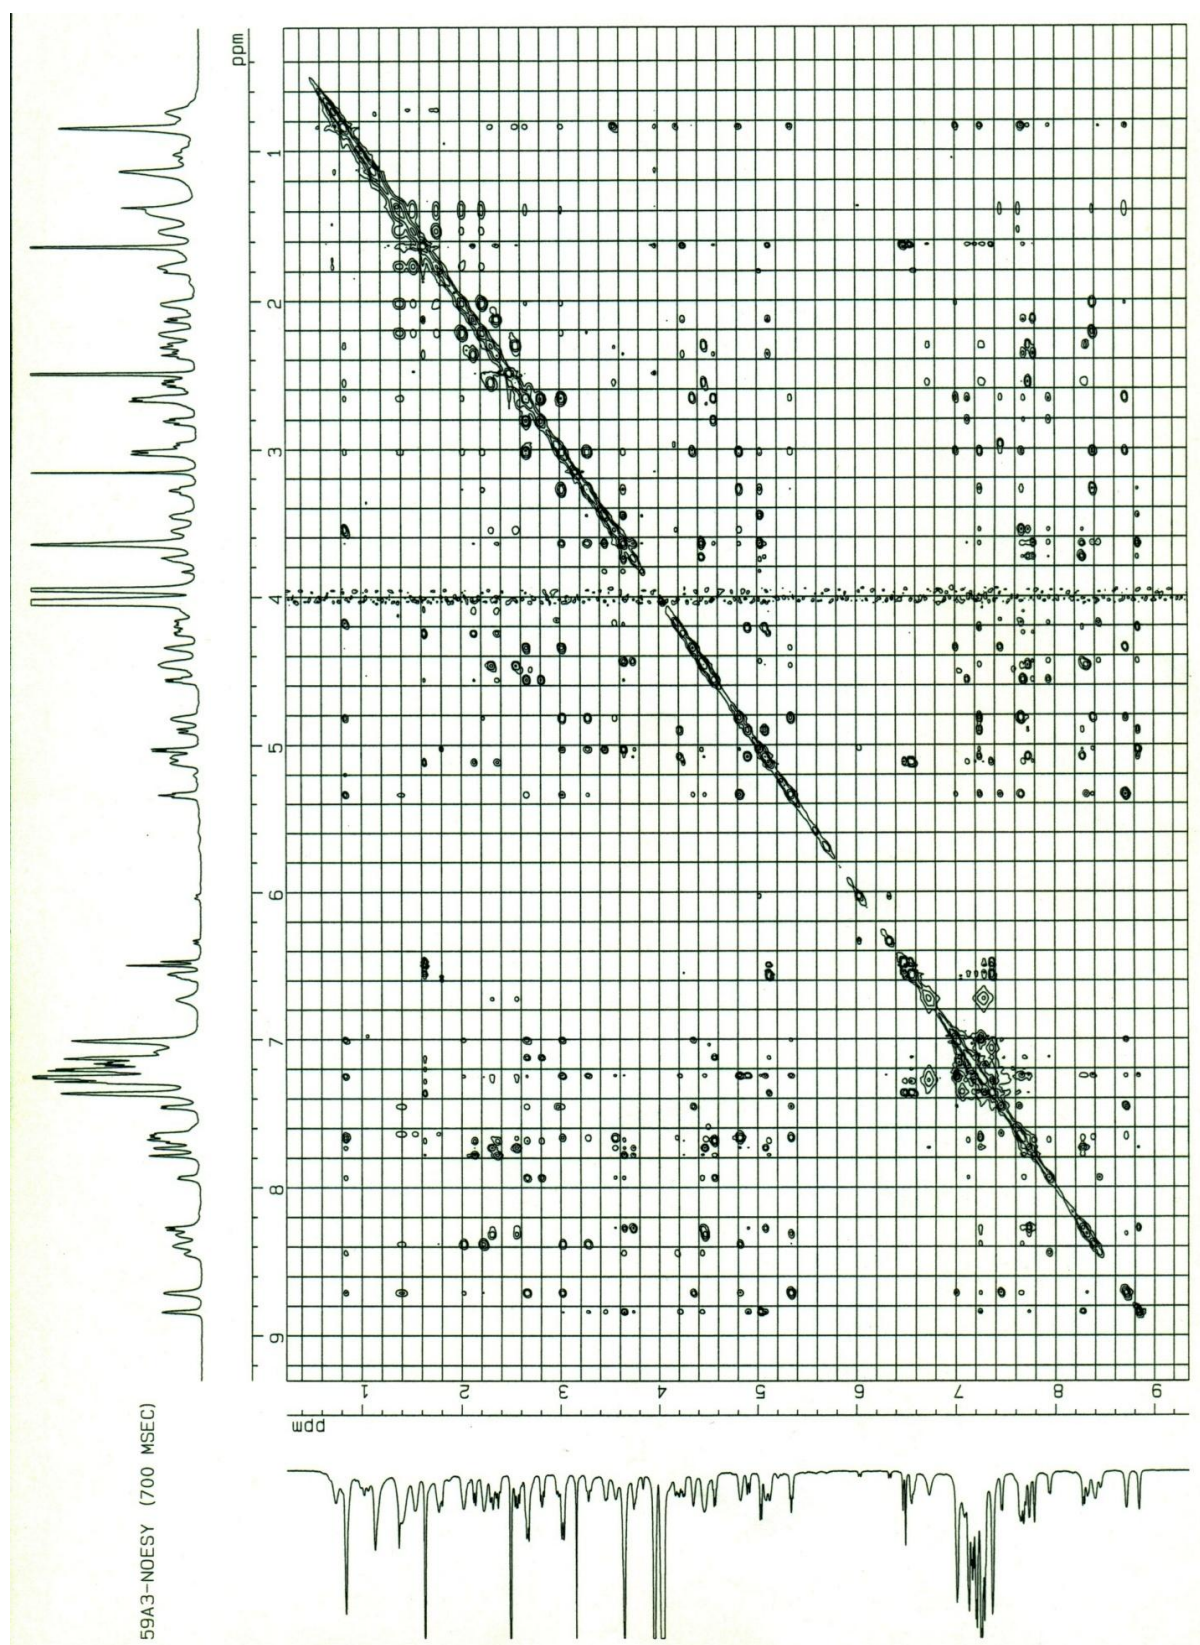

Supplement: s1 [file s1]
